# Supplementary material for: N-Functionalized fluorophores: detecting urinary albumin and imaging lipid droplets
Source: Royal Society of Chemistry journal article supplement (doi:10.1039/d3ob01010d), 2023-01-01

## Supporting information

### N-Functionalized fluorophores: Detecting Urinary Albumin and Imaging Lipid Droplets

Mohini Ghorpade, Ramprasad Regar, Virupakshi Soppina\* and Sriram Kanvah\*

<sup>a</sup>Department of Chemistry, Indian Institute of Technology Gandhinagar, Palaj, Gandhinagar –  
382055

<sup>c</sup>Department of Biological Engineering, Indian Institute of Technology Gandhinagar, Palaj,  
Gandhinagar - 382055

[sriram@iitgn.ac.in](mailto:sriram@iitgn.ac.in); [vsoppina@iitgn.ac.in](mailto:vsoppina@iitgn.ac.in); [vsoppina@gmail.com](mailto:vsoppina@gmail.com)

|          |                                                                                     |
|----------|-------------------------------------------------------------------------------------|
|          | Characterization details of <b>M1 to M4</b>                                         |
| S1       | Absorption spectrum of <b>M1 to M3</b> compound                                     |
| S2       | Emission Spectra of <b>M1 to M3</b>                                                 |
| S3       | BSA interaction study of <b>M1, M2, M4</b>                                          |
| Table S1 | Conformational changes of the protein upon addition of the ligands                  |
| S4       | Isothermal titration graph profile of <b>M1, M2, M4</b>                             |
| Table S2 | ITC calculation.                                                                    |
| S5       | The limit of detection plots for the M1 to M4                                       |
| S6       | Competitive assay of <b>M1, M2 &amp; M4</b> with Warfarin and Ibuprofen             |
| S7       | BSA sensing in artificial urine using <b>M1, M2, M3</b>                             |
| S8       | Cellular imaging of <b>M2</b> in Cos-7 Cells                                        |
| S9       | Cellular imaging of <b>M3</b> in Cos-7 Cells                                        |
| S10      | MTT Assay and Colocalization Line Profile of <b>M4</b> in Cos-7 Cells               |
| S11      | Molecular docking: Ligand interaction diagram of <b>M3</b> and <b>M4</b>            |
|          | <sup>1</sup> H, <sup>13</sup> C NMR and Mass data of compound <b>M1, M2, M3, M4</b> |

---

#### Characterization details of M1 to M4

**M1:** *(Z)-4-(1-cyano-2-(4-(dimethylamino)phenyl)vinyl)-1-tosylpyridin-1-ium chloride.*

<sup>1</sup>H NMR (500 MHz, DMSO-d<sub>6</sub>) δ 8.80 (d, *J* = 6.9 Hz, 2H), 8.45 (s, 1H), 8.13 (d, *J* = 7.0 Hz, 2H), 8.06 (d, *J* = 9.1 Hz, 2H), 7.48 (d, *J* = 8.0 Hz, 2H), 7.12 (d, *J* = 7.8 Hz, 2H), 6.92 (d, *J* = 9.2 Hz, 2H), 3.13 (s, 6H), 2.29 (s, 3H). <sup>13</sup>C NMR (126 MHz, DMSO-d<sub>6</sub>) δ 154.11, 150.44, 143.22, 138.03, 134.16, 128.51, 125.96, 120.93, 120.11, 118.60, 112.47, 40.58, 40.49, 40.41, 40.32, 40.24, 40.15, 40.08, 39.99, 39.82, 39.65, 39.48, 21.25; [M, HRMS=230.1350] (mass found), 230.1339 (actual mass), *m/z*=0.0011.

**M2:** *(Z)-4-(1-cyano-2-(4-(dibutylamino)phenyl)vinyl)-1-tosylpyridin-1-ium chloride*

**<sup>1</sup>H NMR (500 MHz, DMSO-d<sub>6</sub>)** δ 8.79 (d, *J* = 6.9 Hz, 2H), 8.42 (s, 2H), 8.13 (d, *J* = 6.9 Hz, 2H), 8.04 (d, *J* = 9.1 Hz, 2H), 7.48 (d, *J* = 8.0 Hz, 2H), 7.12 (d, *J* = 7.9 Hz, 2H), 6.89 (d, *J* = 9.2 Hz, 1H), 3.53 – 3.35 (m, 3H), 2.29 (s, 3H), 1.55 (d, *J* = 6.9 Hz, 4H), 1.45 – 1.23 (m, 4H), 0.94 (t, *J* = 7.4 Hz, 3H). **<sup>13</sup>C NMR (126 MHz, DMSO-d<sub>6</sub>)** δ 157.32, 155.05, 150.99, 147.61, 142.80, 139.35, 133.27, 130.72, 125.57, 124.44, 123.45, 117.08, 100.08, 55.24, 34.28, 26.00, 24.77, 19.05. [M, HRMS=334.2283] (mass found), 334.2278 (actual mass), m/z=0.0005

**M3: 4-((1*Z*,3*E*)-1-cyano-4-(4-(dimethylamino)phenyl)buta-1,3-dien-1-yl)-1-tosylpyridin-1-ium chloride.**

**<sup>1</sup>H NMR (500 MHz, DMSO-d<sub>6</sub>)** δ 8.79 (d, *J* = 6.7 Hz, 2H), 8.51 (d, *J* = 11.5 Hz, 1H), 8.04 (d, *J* = 6.7 Hz, 2H), 7.62 (d, *J* = 8.8 Hz, 2H), 7.53 (d, *J* = 14.7 Hz, 1H), 7.48 (d, *J* = 8.0 Hz, 2H), 7.19 – 7.13 (m, 1H), 7.12 (d, *J* = 7.8 Hz, 2H), 6.80 (d, *J* = 8.9 Hz, 2H), 3.07 (s, 6H), 2.29 (s, 3H). **<sup>13</sup>C NMR (126 MHz, DMSO-d<sub>6</sub>)** δ 153.13, 152.80, 151.42, 146.27, 143.56, 138.03, 131.75, 128.52, 125.97, 122.72, 120.98, 119.21, 116.54, 112.63, 101.72, 40.58, 40.49, 40.42, 40.33, 40.25, 40.16, 40.08, 39.99, 39.82, 39.66, 39.49, 21. [M, HRMS=274.1493] (mass found), 274.1495 (actual mass), m/z=0.0002

**M4: (Z)-4-(1-cyano-2-(7-(diethylamino)-2-oxo-2H-chromen-3-yl)vinyl)-1-tosylpyridin-1-ium chloride**

**<sup>1</sup>H NMR (500 MHz, DMSO-d<sub>6</sub>)** δ 8.85 (d, *J* = 6.7 Hz, 2H), 8.81 (s, 1H), 8.29 (s, 1H), 8.11 (d, *J* = 6.4 Hz, 2H), 7.66 (d, *J* = 9.1 Hz, 1H), 7.48 (d, *J* = 8.0 Hz, 2H), 7.12 (d, *J* = 7.9 Hz, 2H), 6.87 (dd, *J* = 9.1, 2.3 Hz, 1H), 6.68 (d, *J* = 2.1 Hz, 1H), 3.55 (d, *J* = 7.1 Hz, 4H), 2.29 (s, 3H), 1.17 (t, *J* = 7.0 Hz, 6H). **<sup>13</sup>C NMR (126 MHz, DMSO-d<sub>6</sub>)** δ 160.62, 157.85, 153.78, 146.24, 145.02, 144.30, 138.05, 132.69, 128.52, 125.96, 121.80, 117.17, 111.55, 111.29, 108.58, 97.17, 45.15, 40.57, 40.48, 40.41, 40.32, 40.24, 40.15, 40.07, 39.98, 39.82, 39.65, 39.48, 21.25, 12.91. [M, HRMS=346.1558] (mass found), 346.1539 (actual mass), m/z=0.0019.

S1: (A-C) Absorption spectra of M1-M3 in different solvents

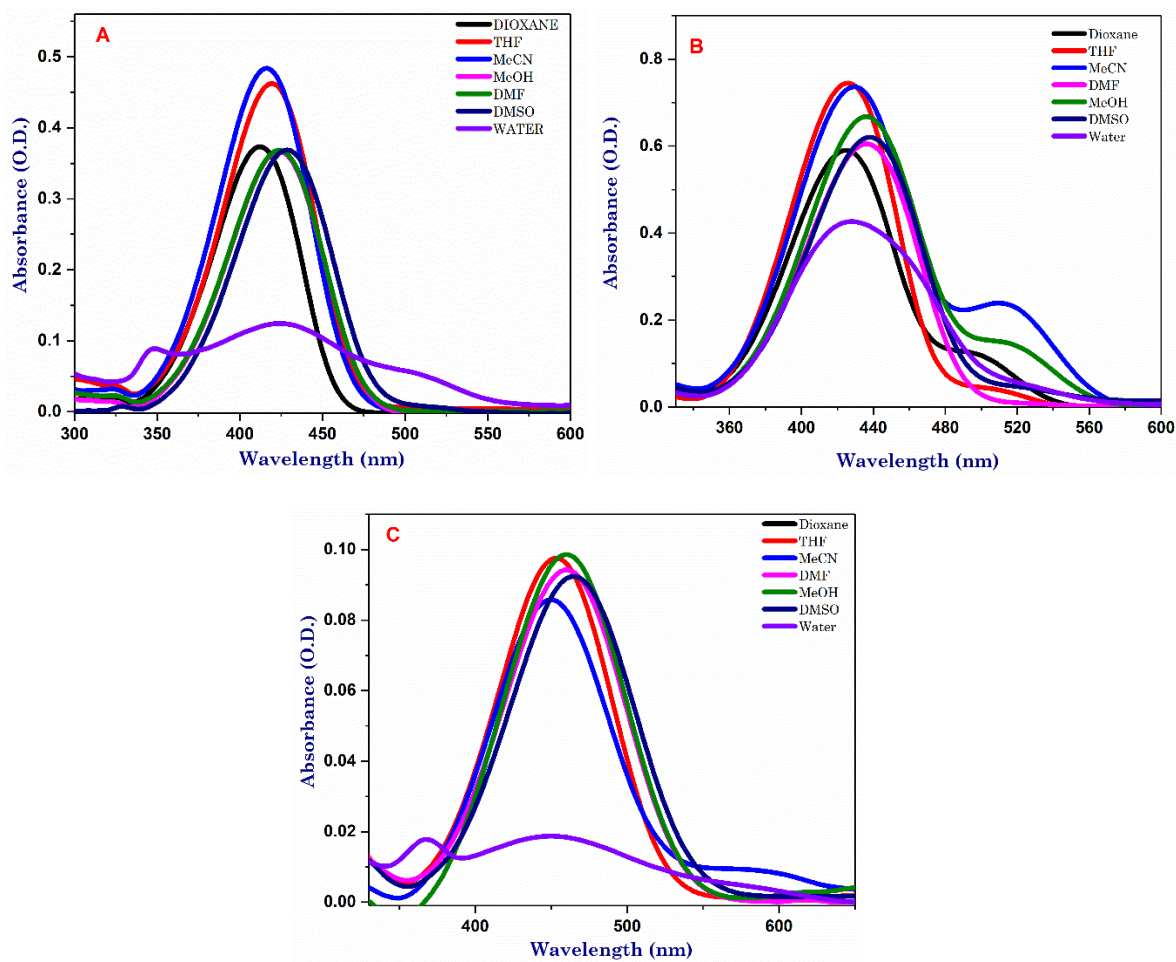

**Fig S2: (D-F)** The emission spectra of **M1-M3** in different solvents.

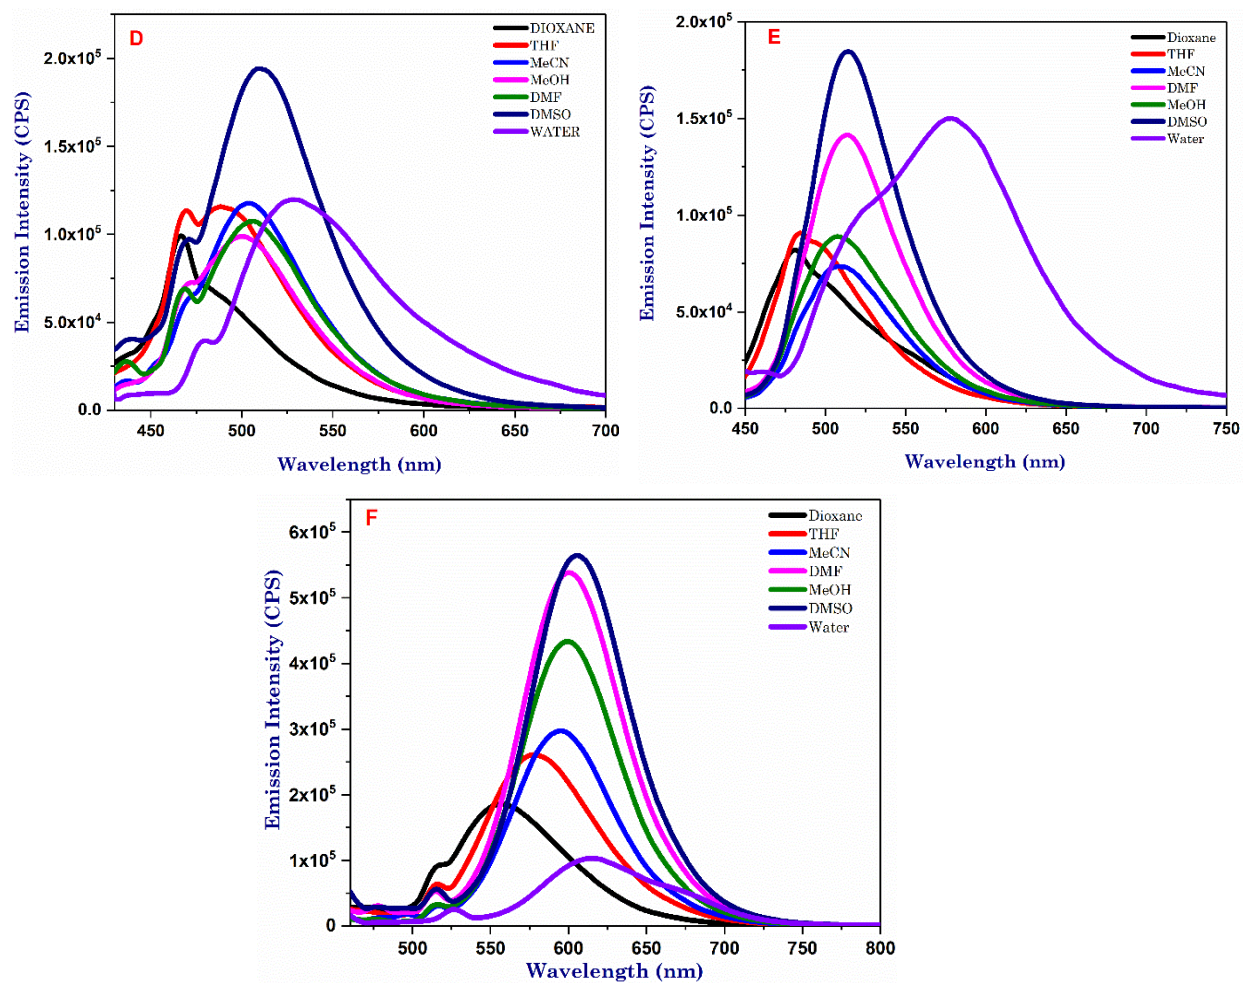

**Fig S3: BSA interaction study:** The emission spectral changes of the (A-C) showing BSA interaction with M1, M2 and M4 respectively.

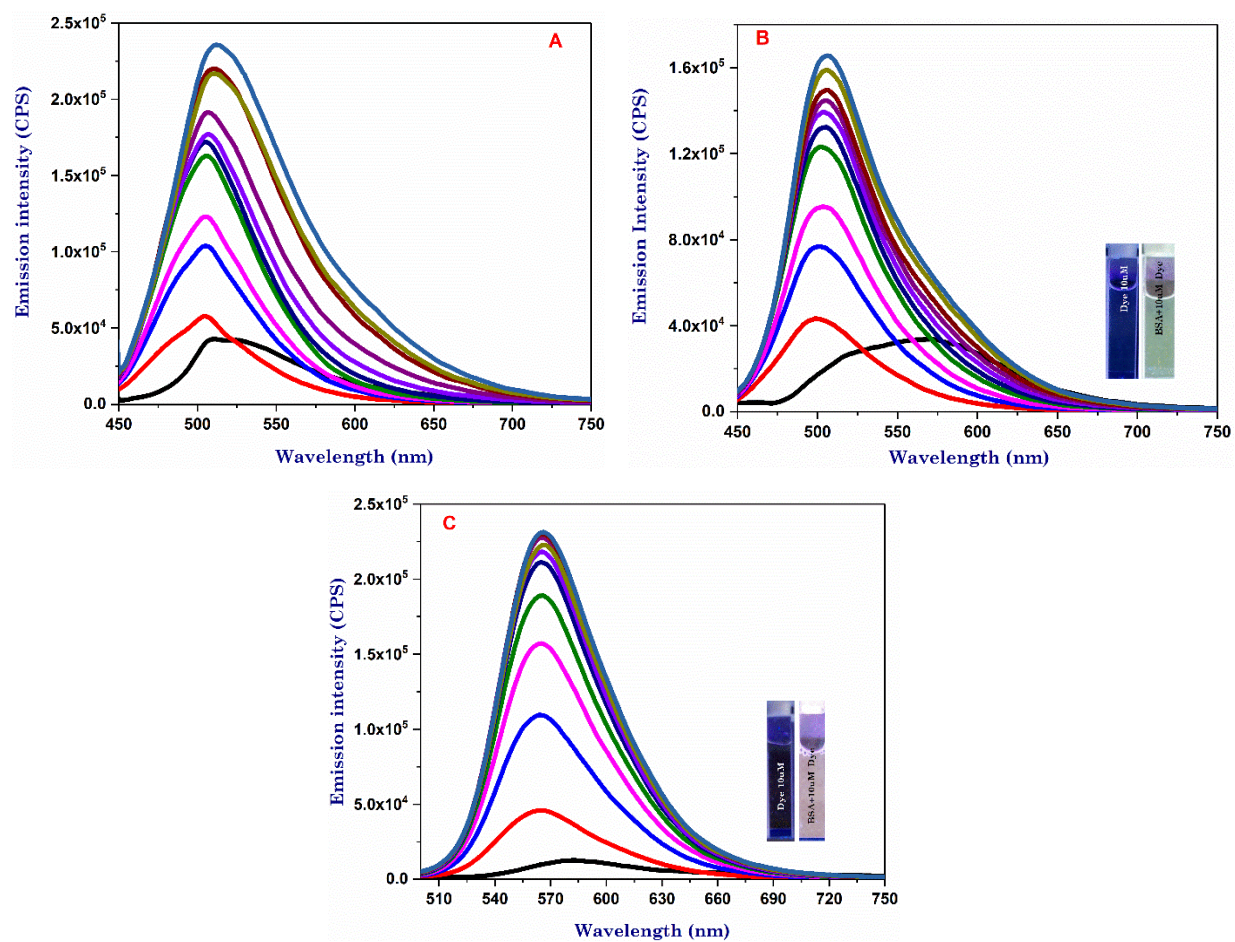

**Table S1:** Protein conformational changes upon binding of the ligands

|                                               | <b>BSA</b> | <b>M1</b> | <b>M2</b> | <b>M3</b> | <b>M4</b> |
|-----------------------------------------------|------------|-----------|-----------|-----------|-----------|
| <b><math>\alpha</math>-Helix</b>              | 37.9       | 0         | 0         | 0         | 0         |
| <b>Antiparallel <math>\beta</math>-sheets</b> | 24.9       | 41.9      | 33.2      | 63.9      | 30.7      |

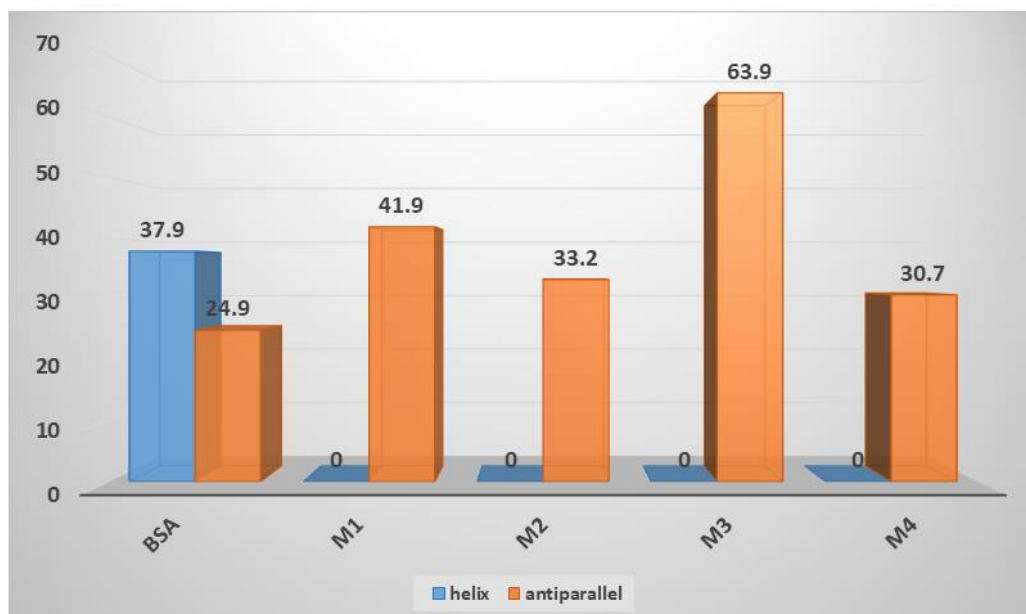

**FigS4:** Isothermal titration profile **M1**, **M2** & **M4** respectively.

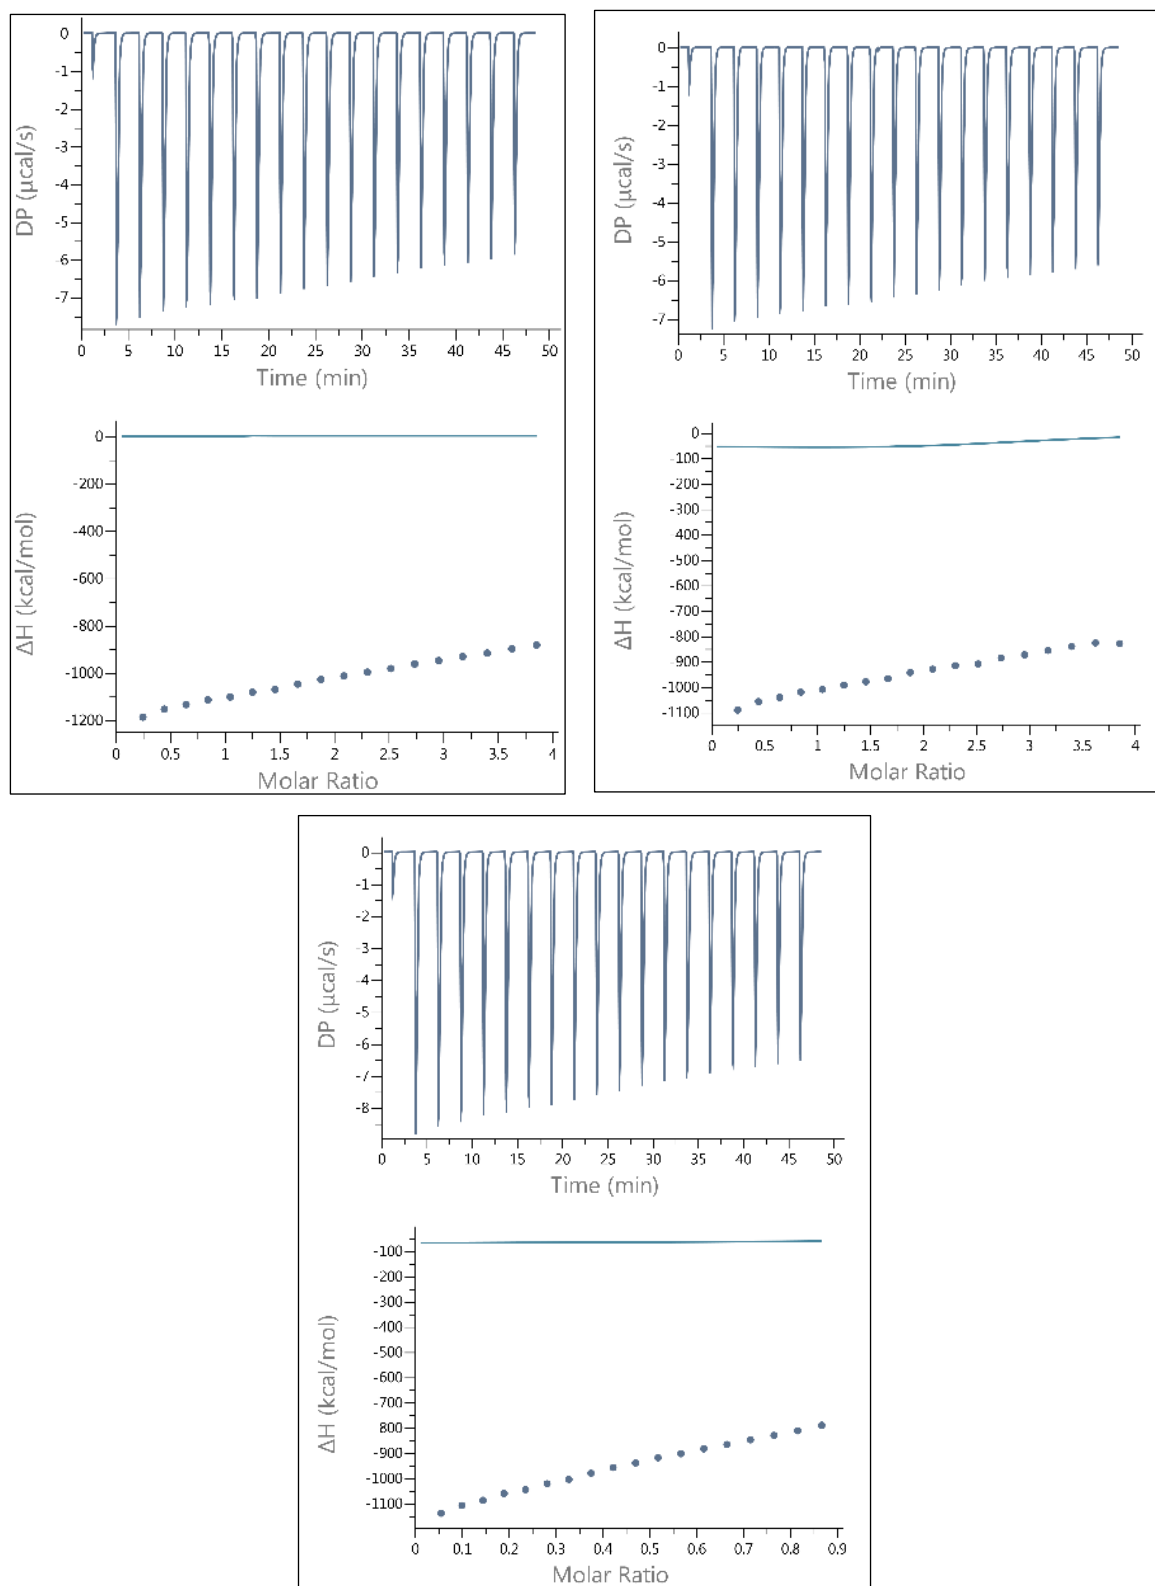

**Table S2:**

|                               | <b>M1</b>     | <b>M2</b>     | <b>M3</b>     | <b>M4</b>     |
|-------------------------------|---------------|---------------|---------------|---------------|
| <b>Kb1</b>                    | $7.88e^{-07}$ | $5.58e^{-07}$ | $1.08e^{-04}$ | $3.38e^{-06}$ |
| <b><math>\Delta G1</math></b> | -8.33         | -8.53         | -5.41         | -7.46         |



**Fig S5:** The limit of detection plots for the M1 to M4

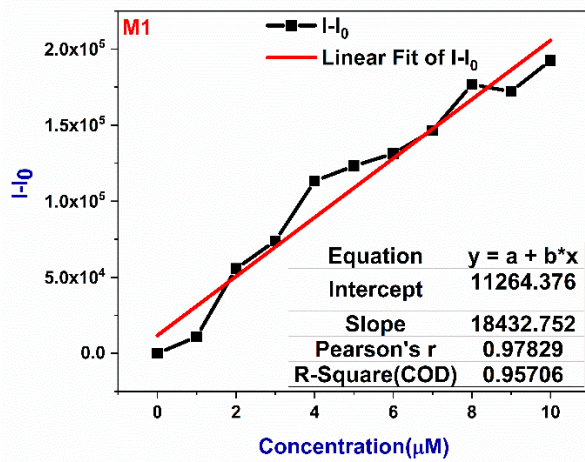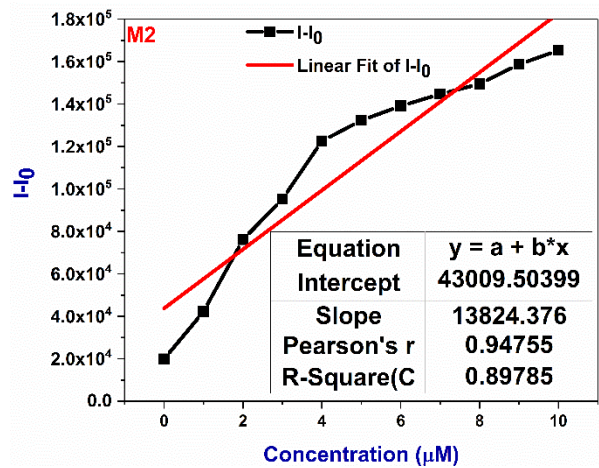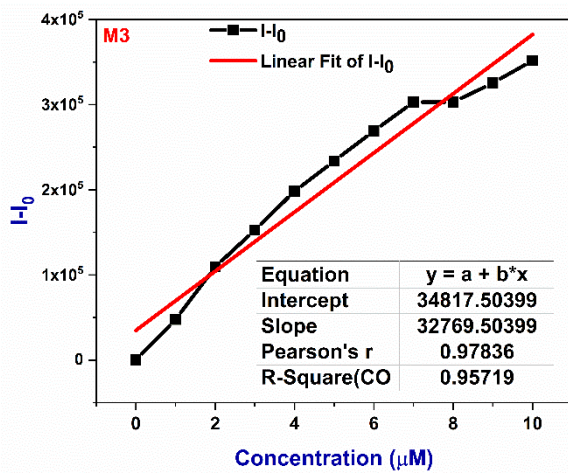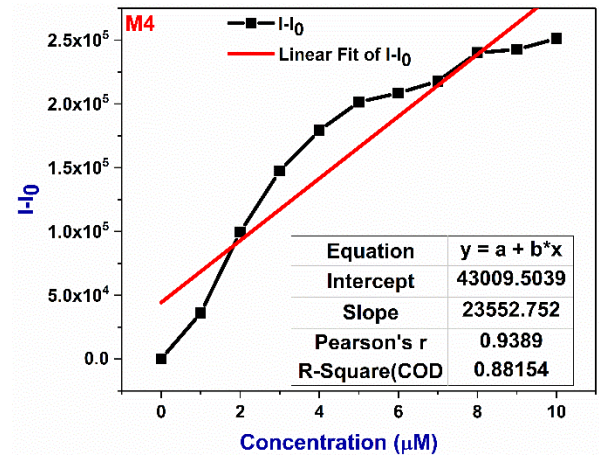



**FigS6:** Competitive assay of **M1** with Warfarin (A) and Ibuprofen (A2) and **M2** with Warfarin (B) and Ibuprofen (B2) **M4** (Warfarin C and Ibuprofen C2).

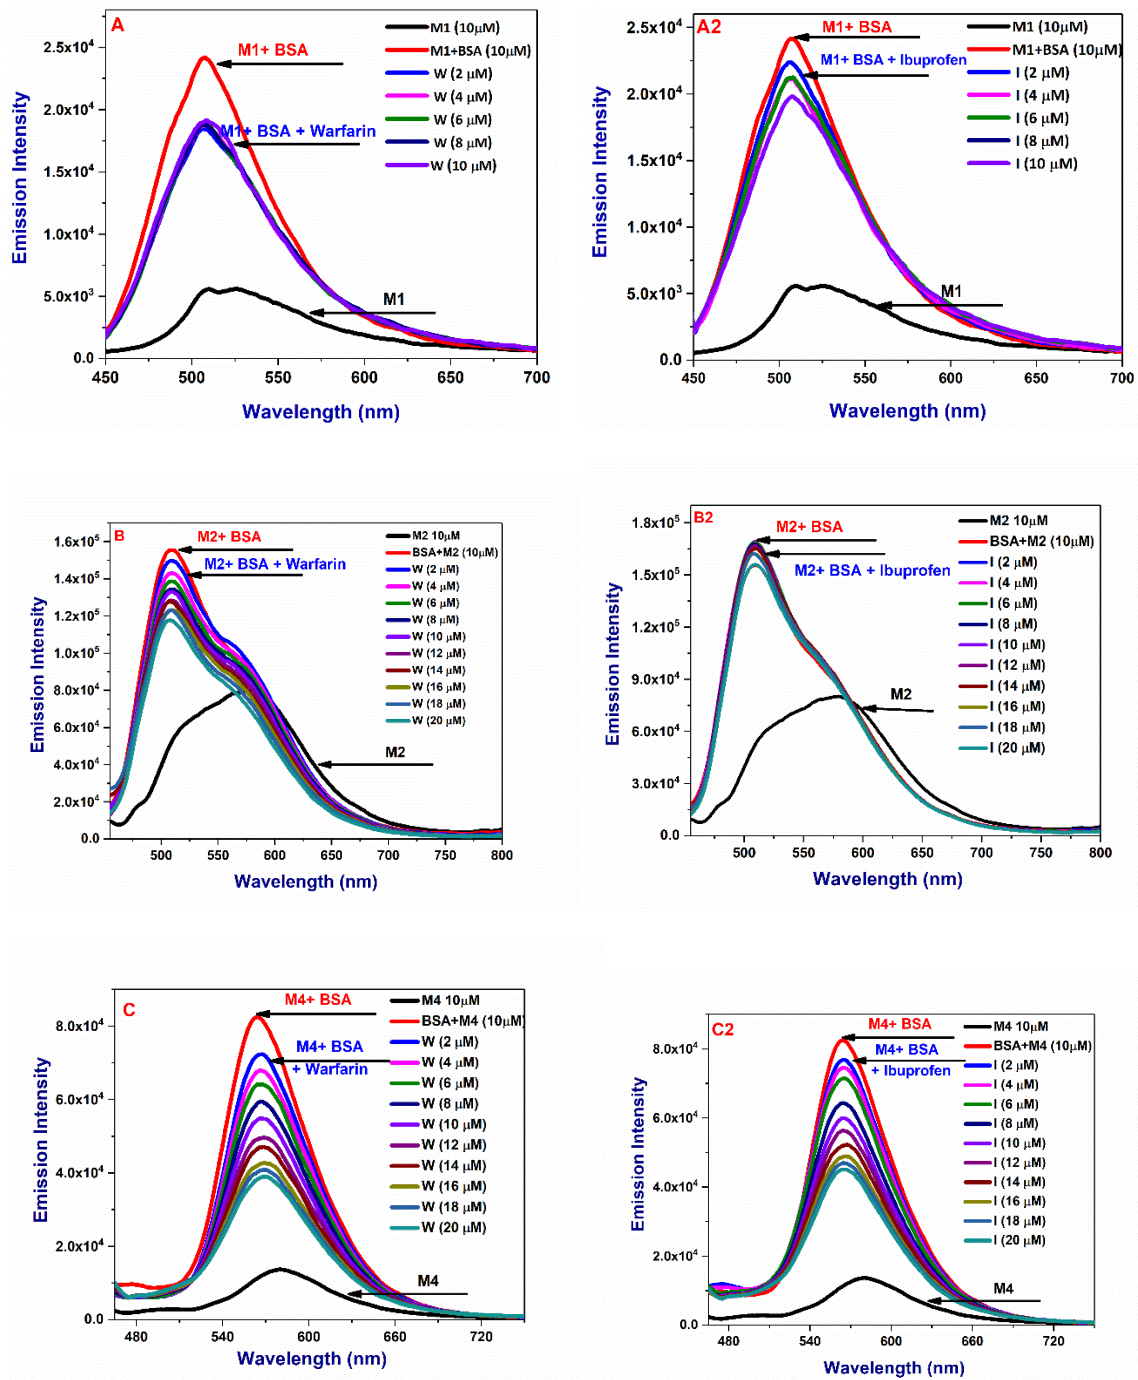

**Fig S7:** Molecular docking: Ligand interaction diagrams of **M3** and **M4**

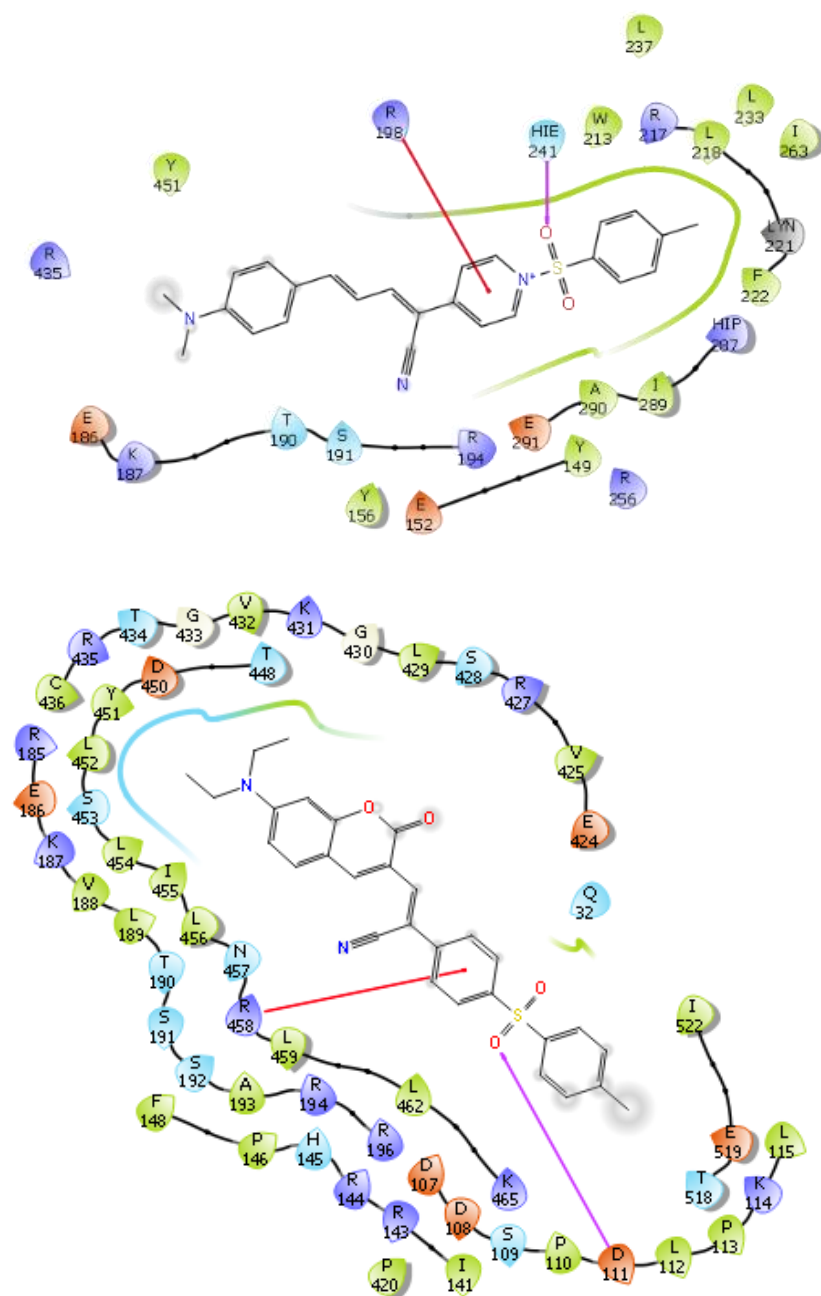

**Fig S8:** BSA sensing in artificial urine using M1- M2, M3

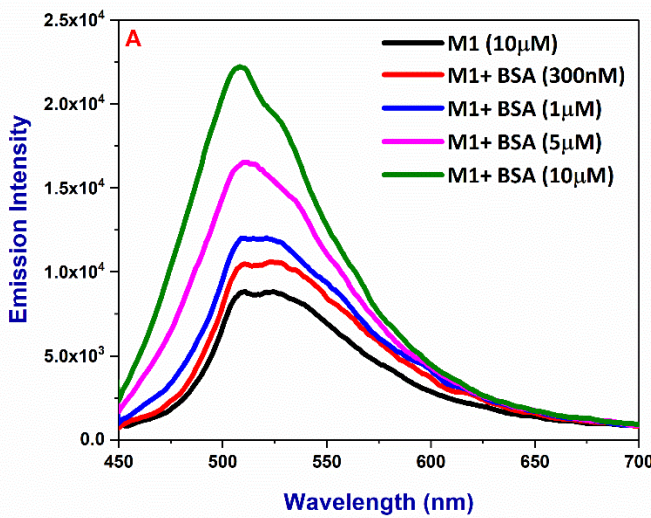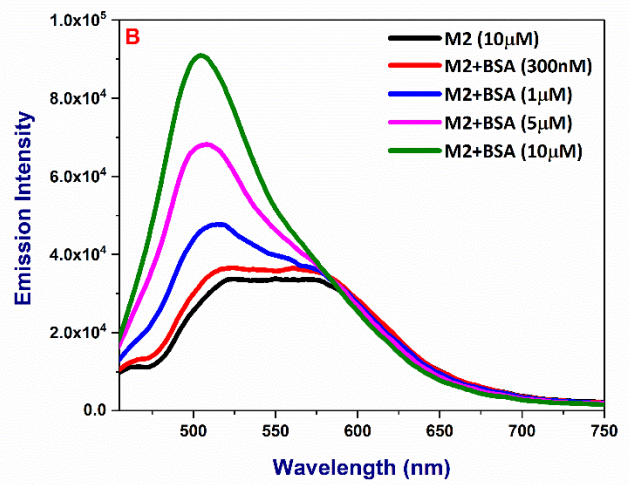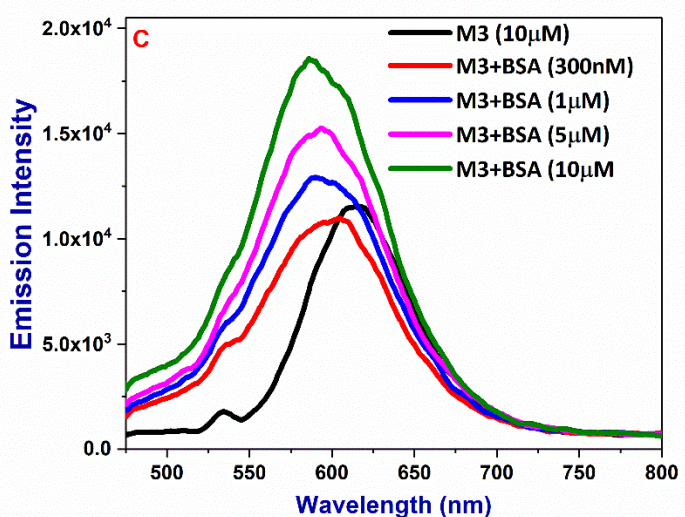



**Fig S9:** Cellular imaging with **M2** in Cos-7 cells. (Scale: 10  $\mu\text{m}$ ): A: **M2**-alone, B: Nile red (20 nM); C: merged image; D: **M2** with bright field images of the droplets.

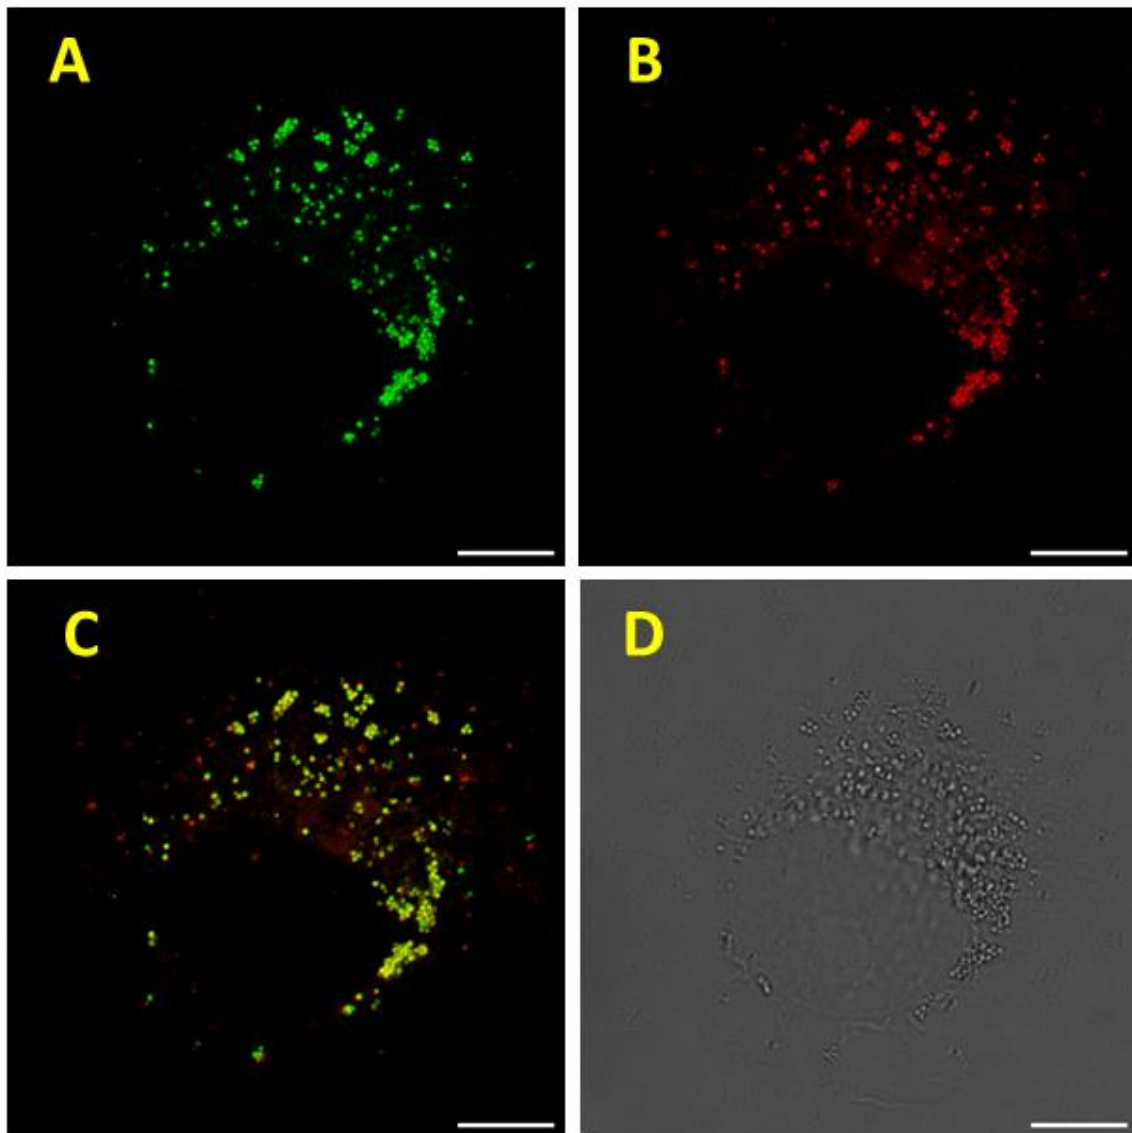

**Fig S10:** Cellular imaging of **M3** in Cos-7 cells A: **M3** alone, B **M3** overlapped with bright field image of the cells: Overlap noted with lipid droplets is weak and the dye is scattered at other places: Scale (10  $\mu\text{m}$ ).

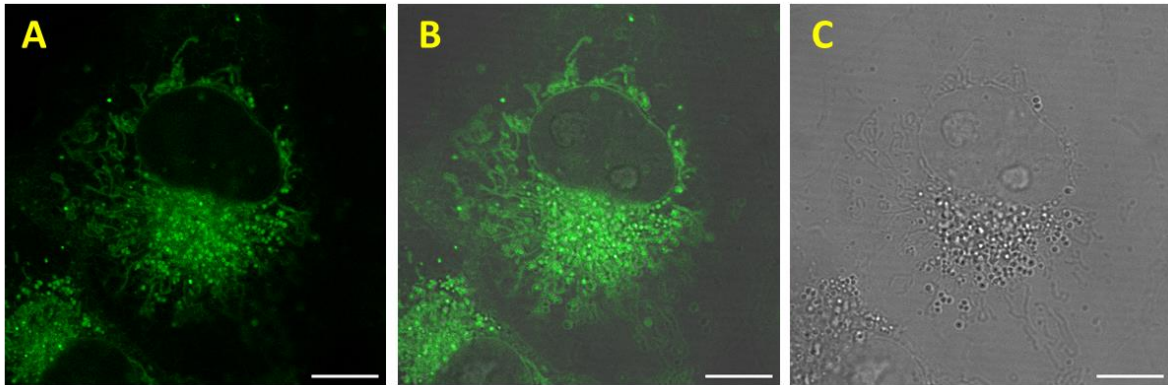

**Fig S11:** MTT Assay of **M4** and colocalization line profile (below) plot of **M4** with Nile Red.

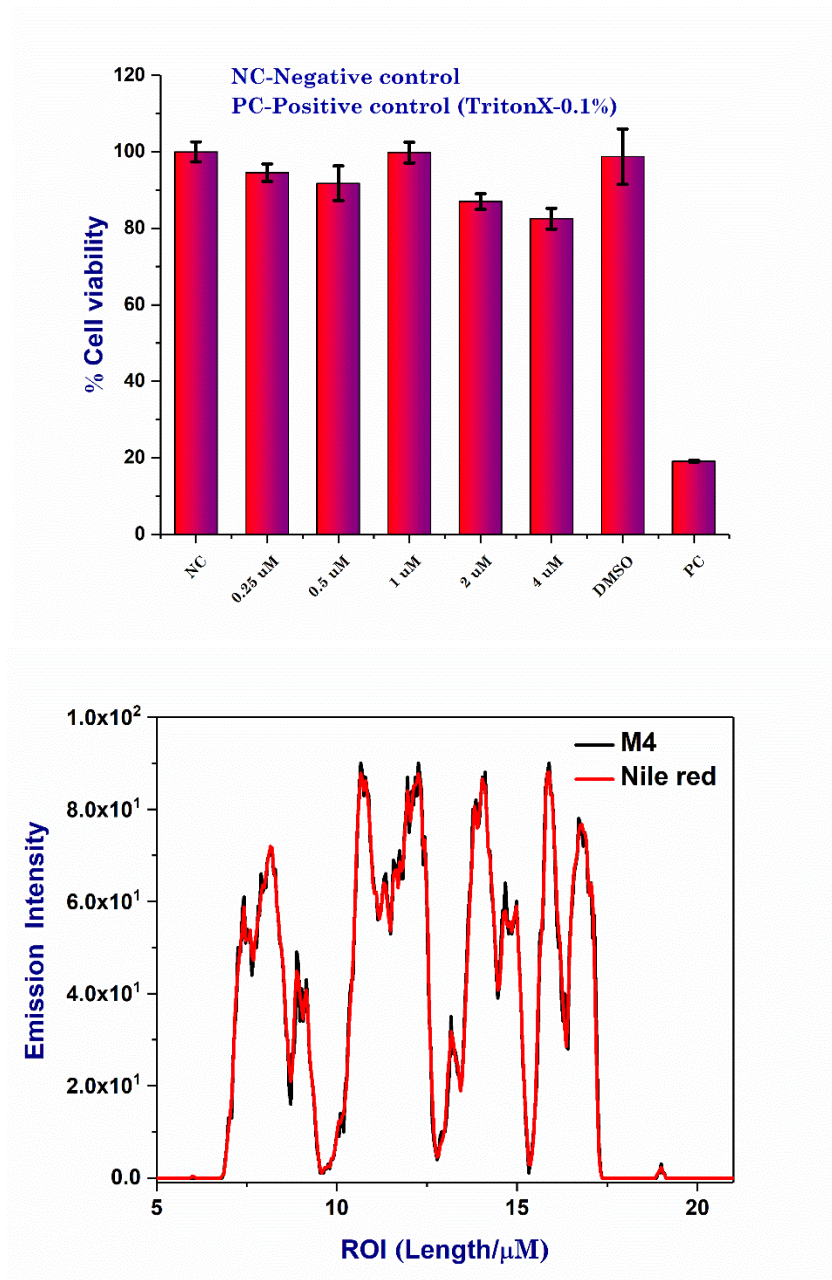



## Characterization Spectral data

### $^1\text{H}$ , $^{13}\text{C}$ NMR and Mass data of compound M1- M4:

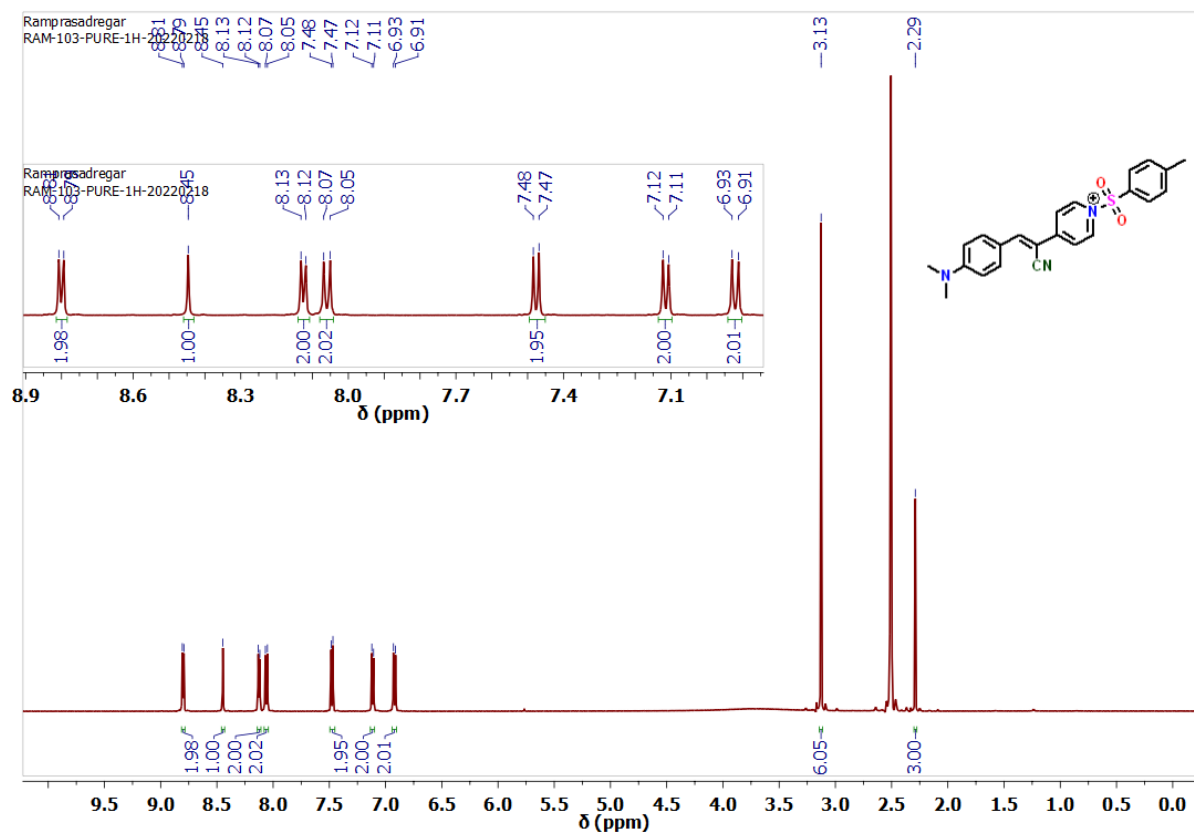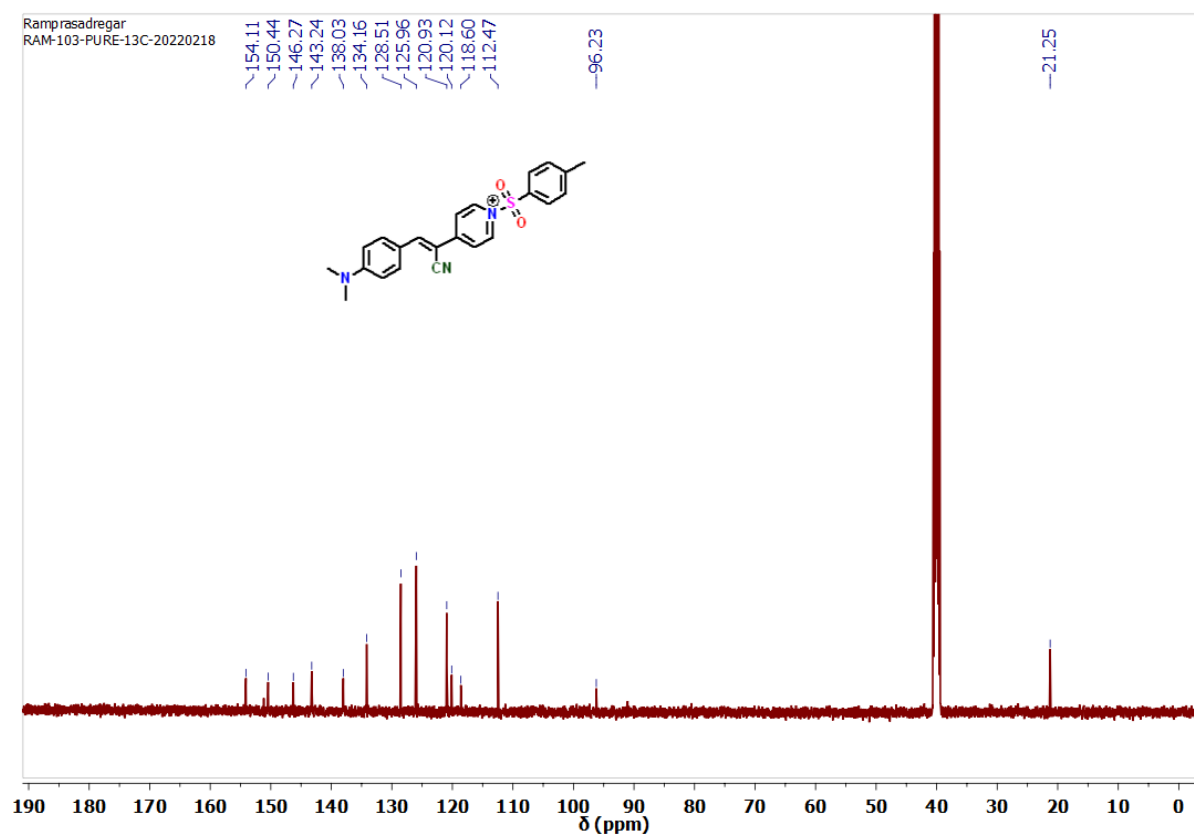

SKG\_MG\_103

IITGN\_POS\_Mix\_10\_July\_2023\_8 186 (4.388)

1: TOF MS ES+  
1.69e5

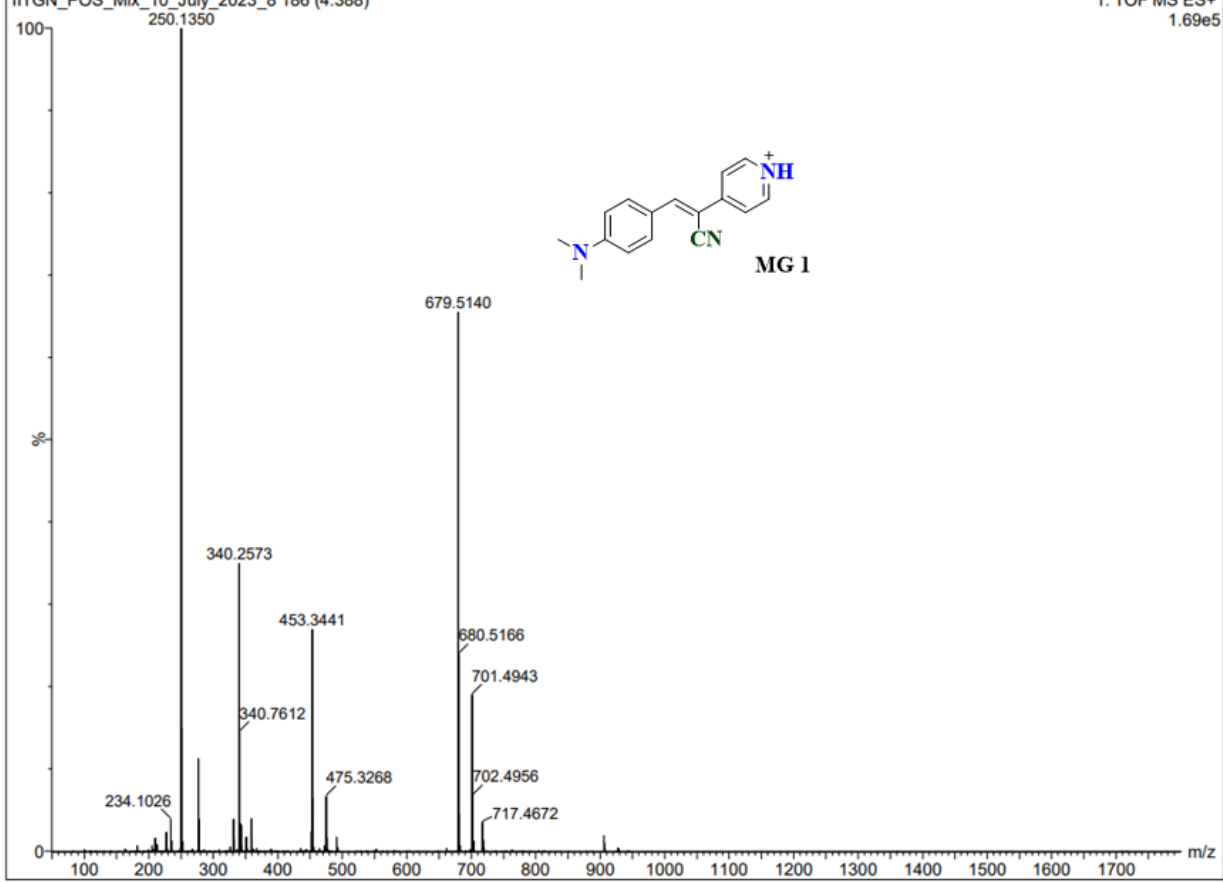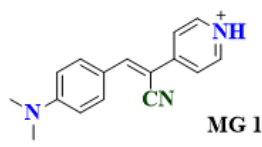

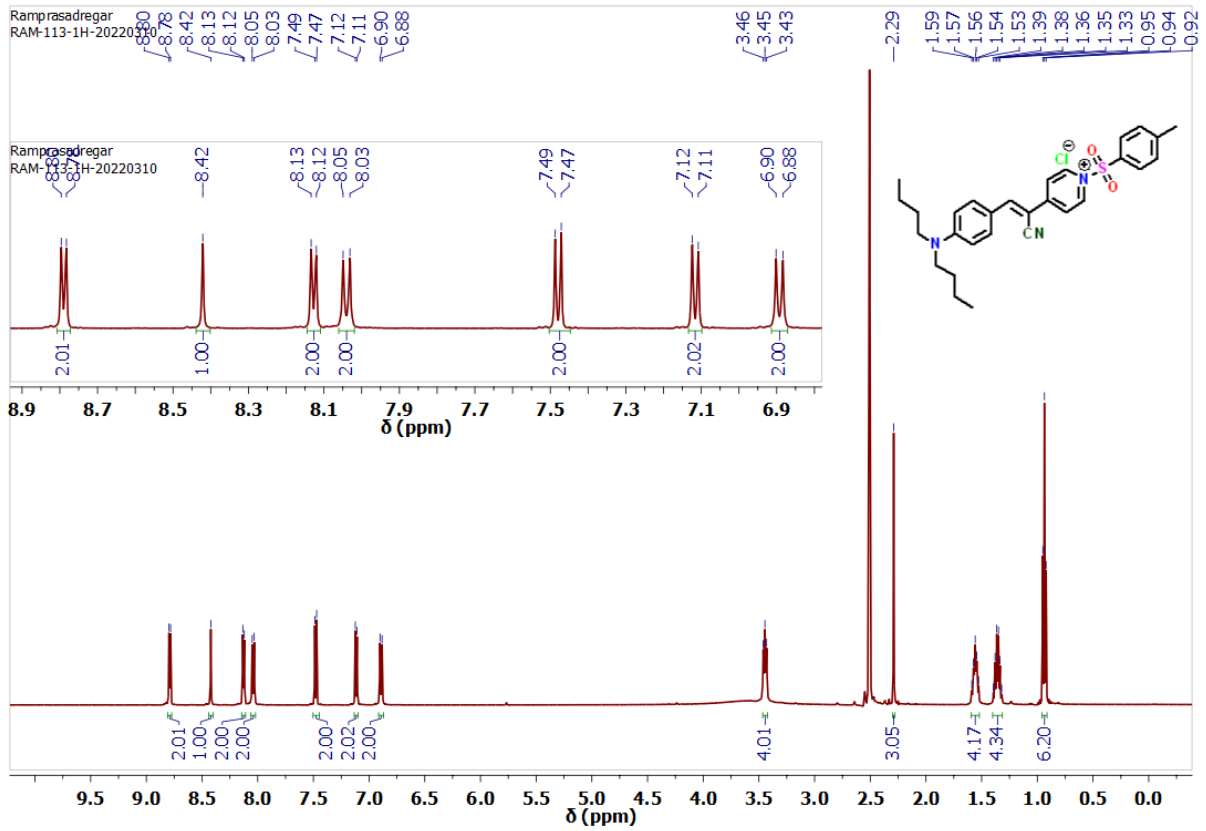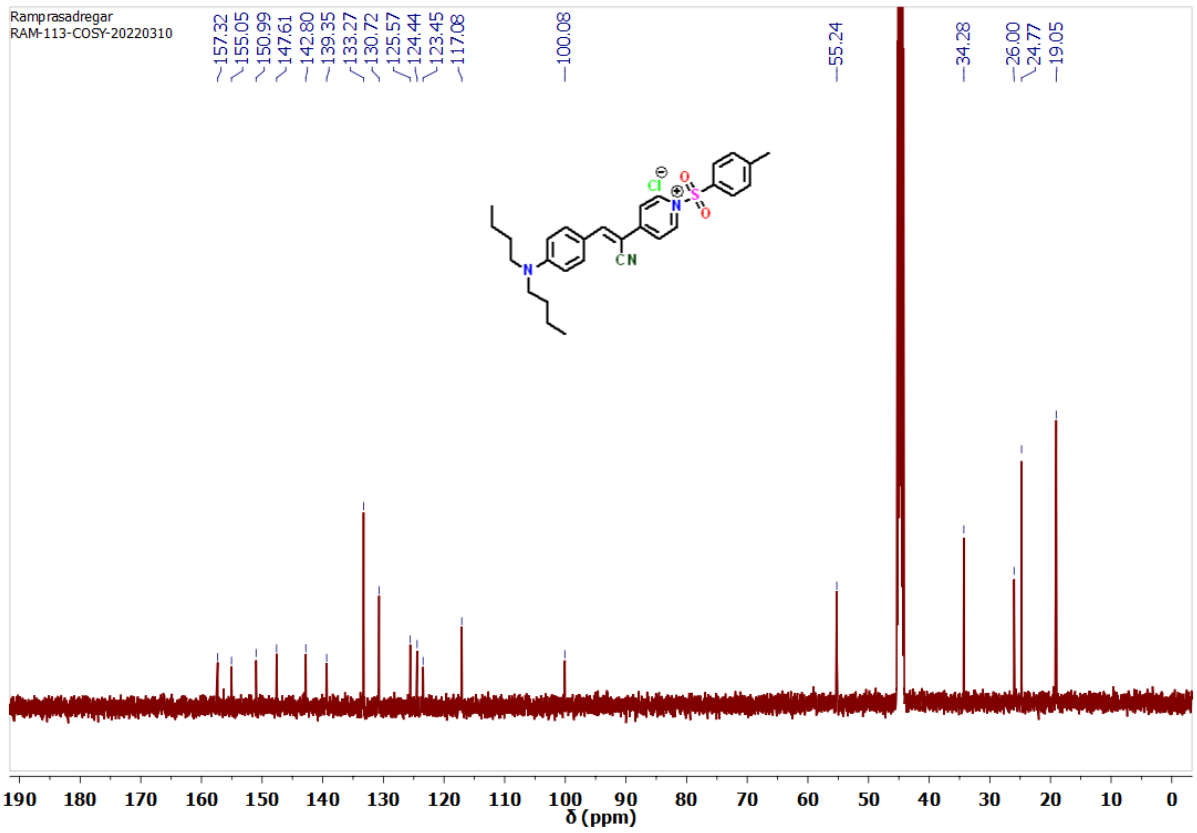

SKG\_MG\_113

IITGN\_POS\_Mix\_10\_July\_2023\_9 287 (6.768) AM2 (Ar,30000.0,556.28,0.00,LS 5); ABS

1: TOF MS ES+  
1.25e6

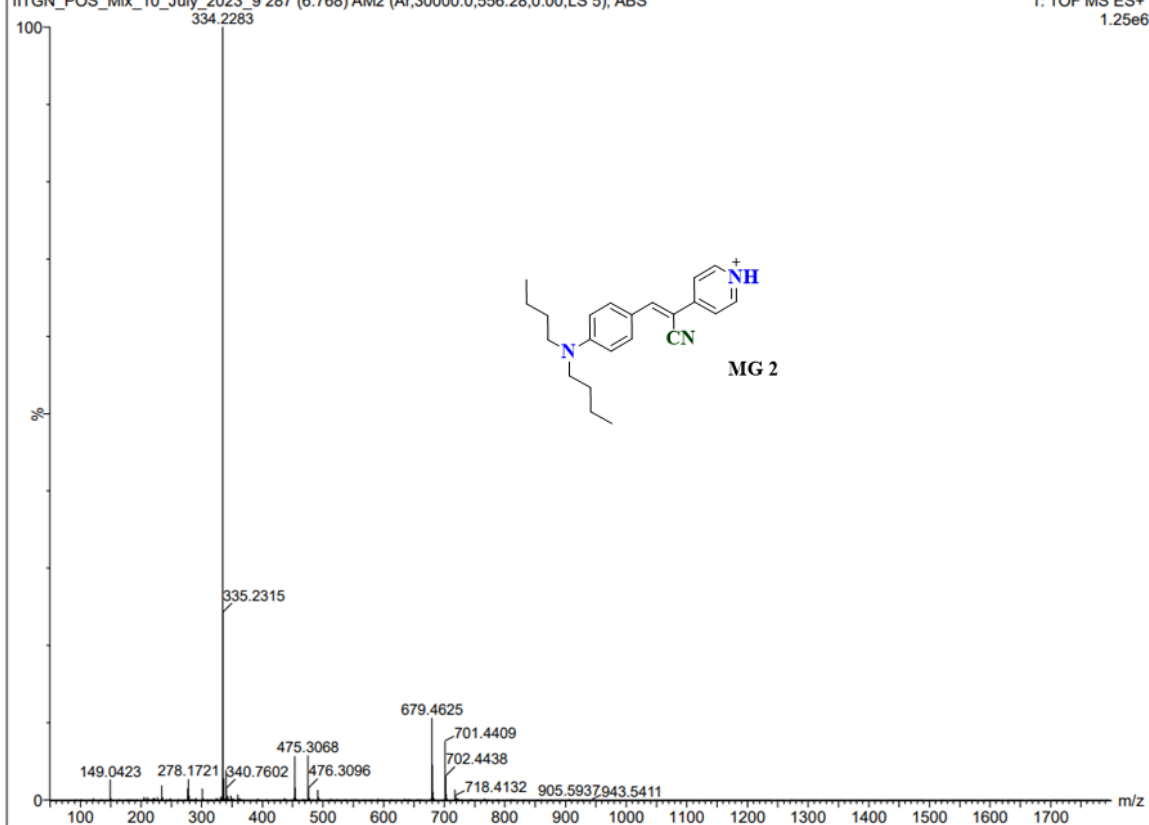

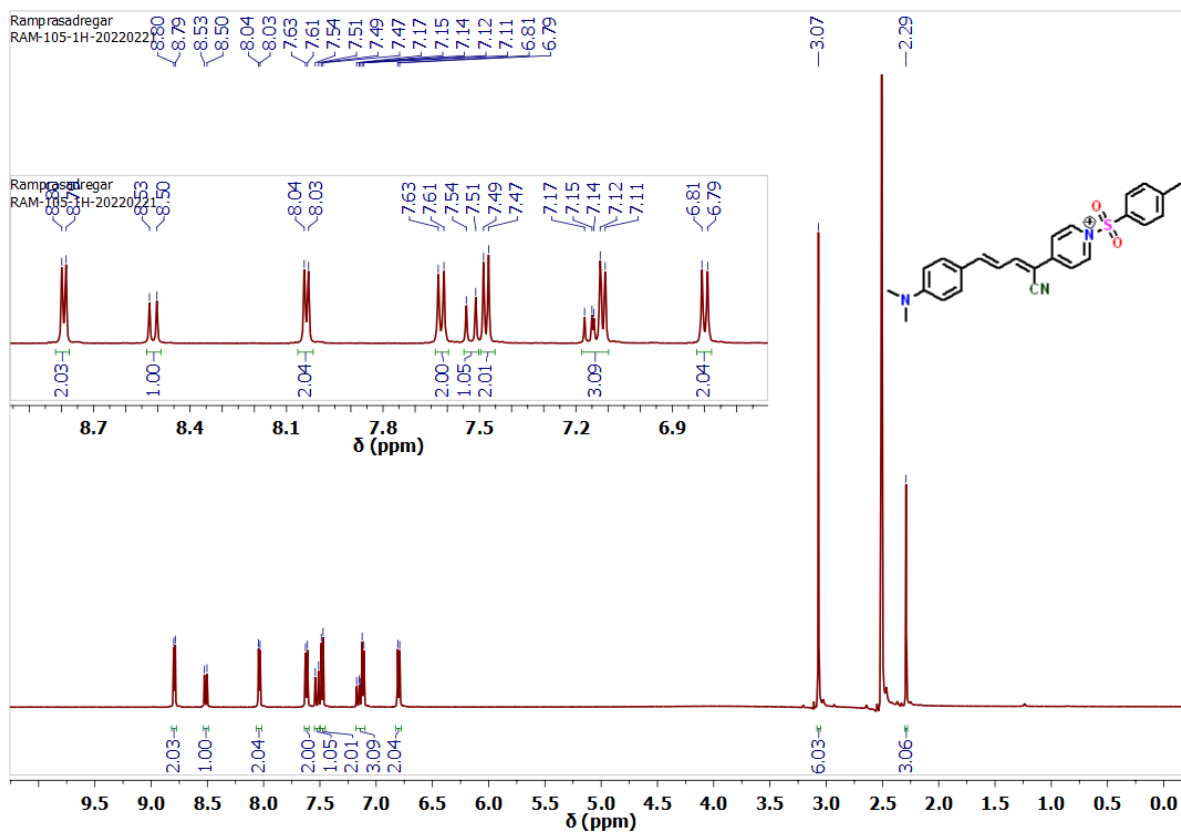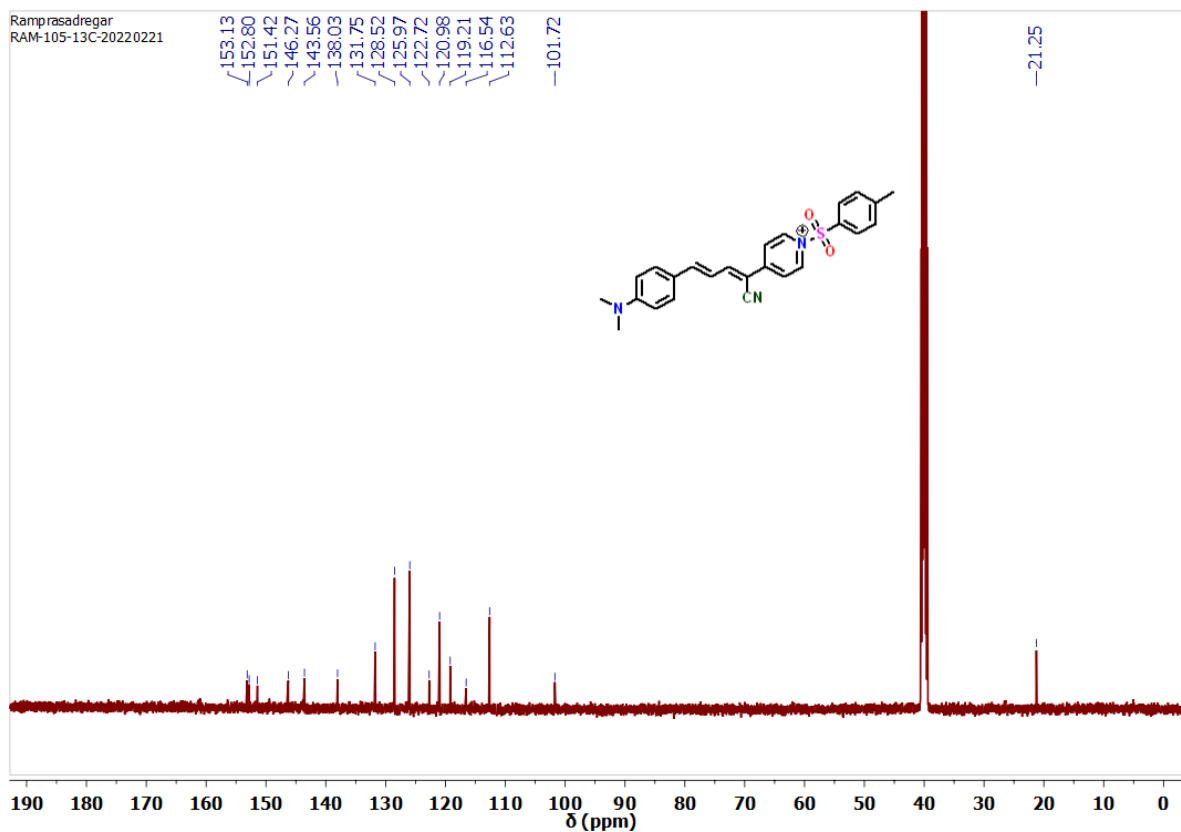

SKG\_MG\_105

IITGN\_POS\_Mix\_10\_July\_2023\_10\_214 (5.059) AM2 (Ar,30000.0,556.27,0.00,LS 30); ABS

1: TOF MS ES+  
4.47e5

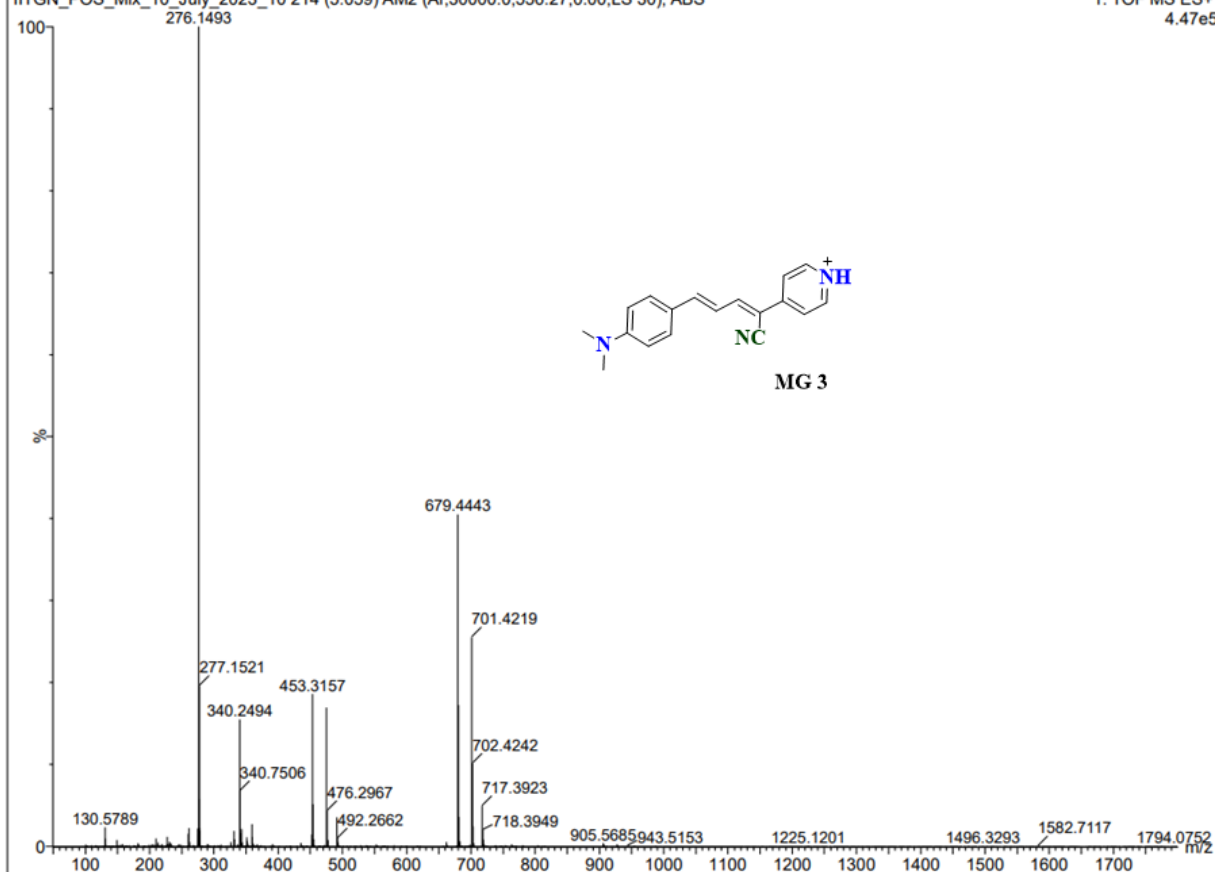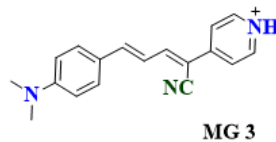



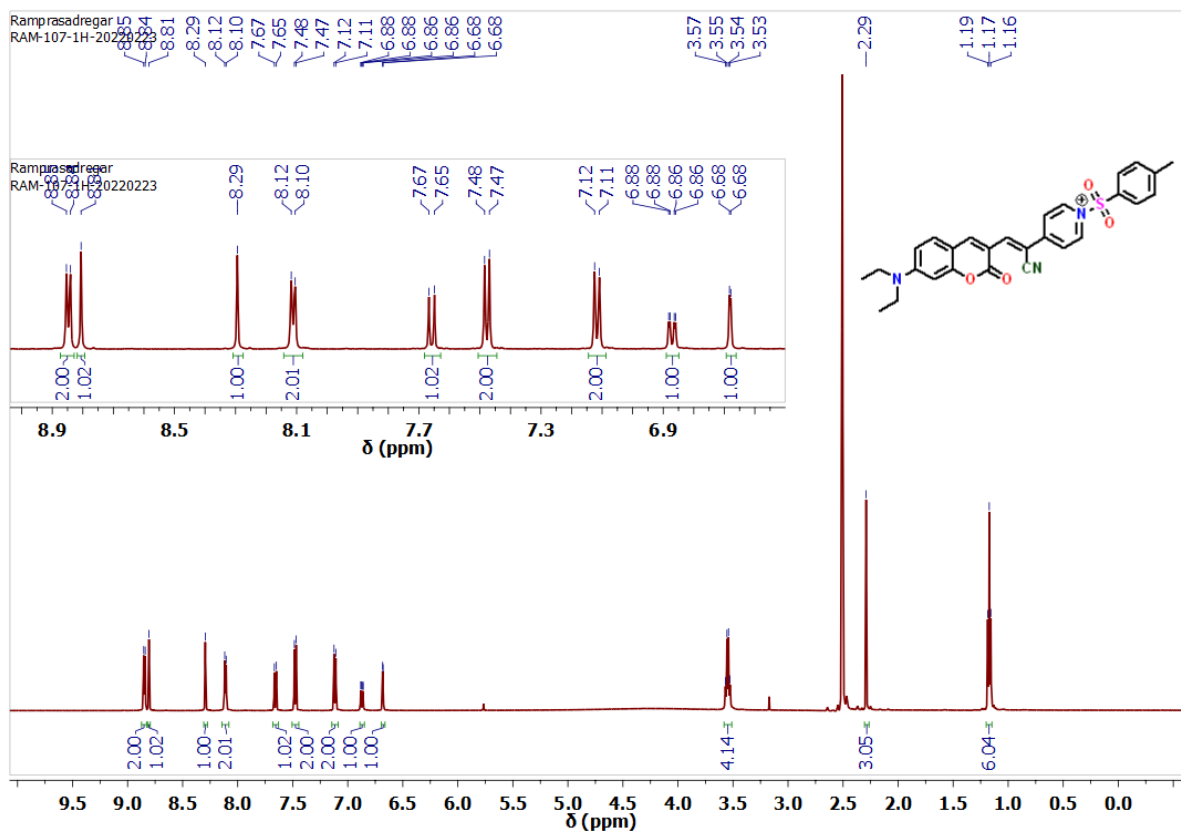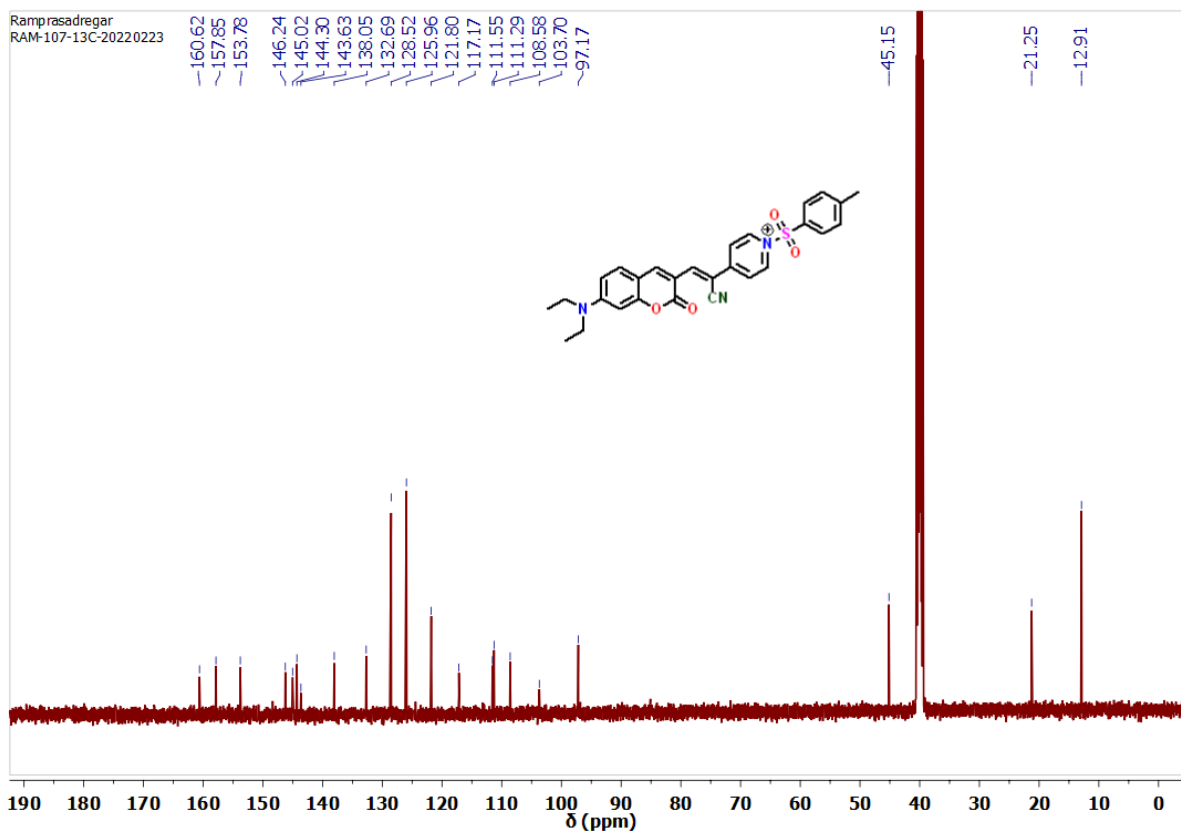

SKG\_MG\_107

IITGN\_POS\_Mix\_10\_July\_2023\_11\_232 (5.482) AM2 (Ar,30000.0,556.30,0.00,LS 1); ABS

1: TOF MS ES+  
1.51e6

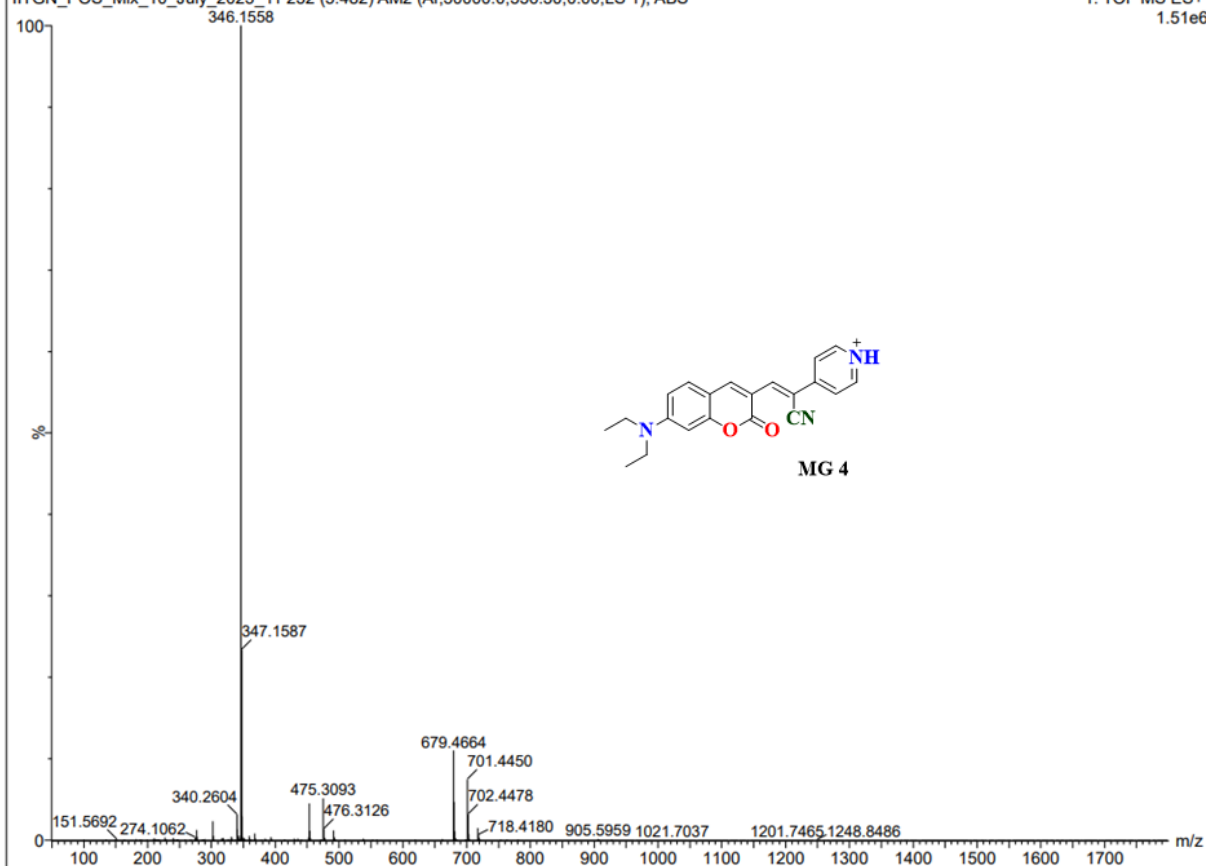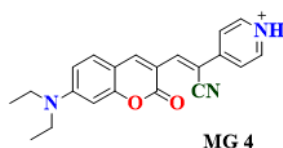

Supplement: d3ob01010d1.pdf [file d3ob01010d1.pdf]
